# Supplementary material for: Spatial and temporal coordination of Duox/TrpA1/Dh31 and IMD pathways is required for the efficient elimination of pathogenic bacteria in the intestine of Drosophila larvae
Source: eLife. 2024 Nov 22;13:RP98716. doi: 10.7554/eLife.98716 (PMC11584180; doi:10.7554/eLife.98716)
Supplement: Source data 1. [file elife-98716-data1.xlsx]

## Sheet: Ecc15-GFP
2024-07-17
		w-	Oregon	Drosdel (w1118)
	No food	14	55	50
	Food + block	41	87	10
	Food not block	5	0	4
		0.891304	1	0.714286						w-	Oregon	Drosdel (w1118)
								Sum Ecc15*	Food + block	124	206	141
									Food not block	10	11	8
2024-07-18										134	217	149
		w-	Oregon	Drosdel (w1118)					% blockage	0.925373	0.949309	0.946309
	No food	5	27	6
	Food + block	11	32	10
	Food not block	1	7	0
		0.916667	0.820513	1
2024-07-24		w-	Oregon	Drosdel (w1118)
	No food	12	19	10
	Food + block	72	87	47
	Food not block	4	4	0
		0.947368	0.956044	1
2024-07-30		Drosdel(w1118)
	No food	20
	Food + block	74
	Food not block	4
		0.948718

## Sheet: Bt-GFP
2024-07-30		w-	Oregon	Drosdel (w1118)
	No food	16	12	21
	Food + block	77	32	36
	Food not block	11	1	2
		0.875	0.969697	0.947368						w-	Oregon	Drosdel (w1118)
								Sum Bt*	Food + block	150	113	120
									Food not block	11	1	4
										161	114	124
02/08/204	lot1	w-	Oregon	Drosdel (w1118)					% blockage	0.931677	0.991228	0.967742
	No food	20	27	50
	Food + block	32	42	39
	Food not block	0	0	0
		1	1	1
02/08/204	lot2	w-	Oregon	Drosdel (w1118)
	No food	17	12	37
	Food + block	41	39	45
	Food not block	0	0	2
		1	1	0.957447

## Sheet: L. planta-GFP
2024-07-18
		w-	Oregon	Drosdel (w1118)
	No food	12	21	13
	Food + block	0	0	0
	Food not block	14	62	25
		0	0	0						w-	Oregon	Drosdel (w1118)
								Sum Lp*	Food + block	3	2	0
									Food not block	201	151	127
										204	153	127
2024-07-31		w-	Oregon	Drosdel (w1118)					% blockage	0.0147059	0.0130719	0
	No food	19	57	53
	Food + block	2	1	0
	Food not block	98	31	30
		0.02	0.03125	0
2024-08-01		w-	Oregon	Drosdel (w1118)
	No food	17	32	30
	Food + block	1	1	0
	Food not block	89	58	72
		0.0111111	0.0169492	0

## Sheet: L. planta +uracil
2024-08-28
		L. planta	L. planta + uracil 20nM
	No food	10	21
	Food + block	0	4
	Food not block	63	75
		0	0.0506329							L. planta	L. planta + uracil 20nM
								Sum Lp*	Food + block	0	4
									Food not block	164	187
										164	191
19/09/2024 am		L. planta	L. planta + uracil 20nM						% blockage	0	0.0209424
	No food	7	9
	Food + block	0	0
	Food not block	44	49
		0	0
19/09/2024 pm		L. planta	L. planta + uracil 20nM
	No food	12	11
	Food + block	0	0
	Food not block	57	63
		0	0
